# Supplementary material for: The anti-tumor function of the IKK inhibitor PS1145 and high levels of p65 and KLF4 are associated with the drug resistance in nasopharyngeal carcinoma cells
Source: PubMed Central journal article supplement (PMC6700134; doi:10.1038/s41598-019-48590-7), 2019-08-19
Supplement: 41598_2019_48590_MOESM1_ESM.pdf [file 41598_2019_48590_MOESM1_ESM.pdf]

## Supplementary data

**Title: The anti-tumor function of the IKK inhibitor PS1145 and high levels of p65 and KLF4 are associated with the drug resistance in nasopharyngeal carcinoma cells**

Hong Lok Lung<sup>1#\*</sup>, Rebecca Kan<sup>2,a#</sup>, Wai Yin Chau<sup>1</sup>, On Ying Man<sup>1</sup>, Nai Ki Mak<sup>1,4</sup>, Chun Hung Fong<sup>1,b</sup>, Wai Ho Shuen<sup>2,c</sup>, Sai Wah Tsao<sup>3,4</sup>, Maria Li Lung<sup>2,4\*</sup>

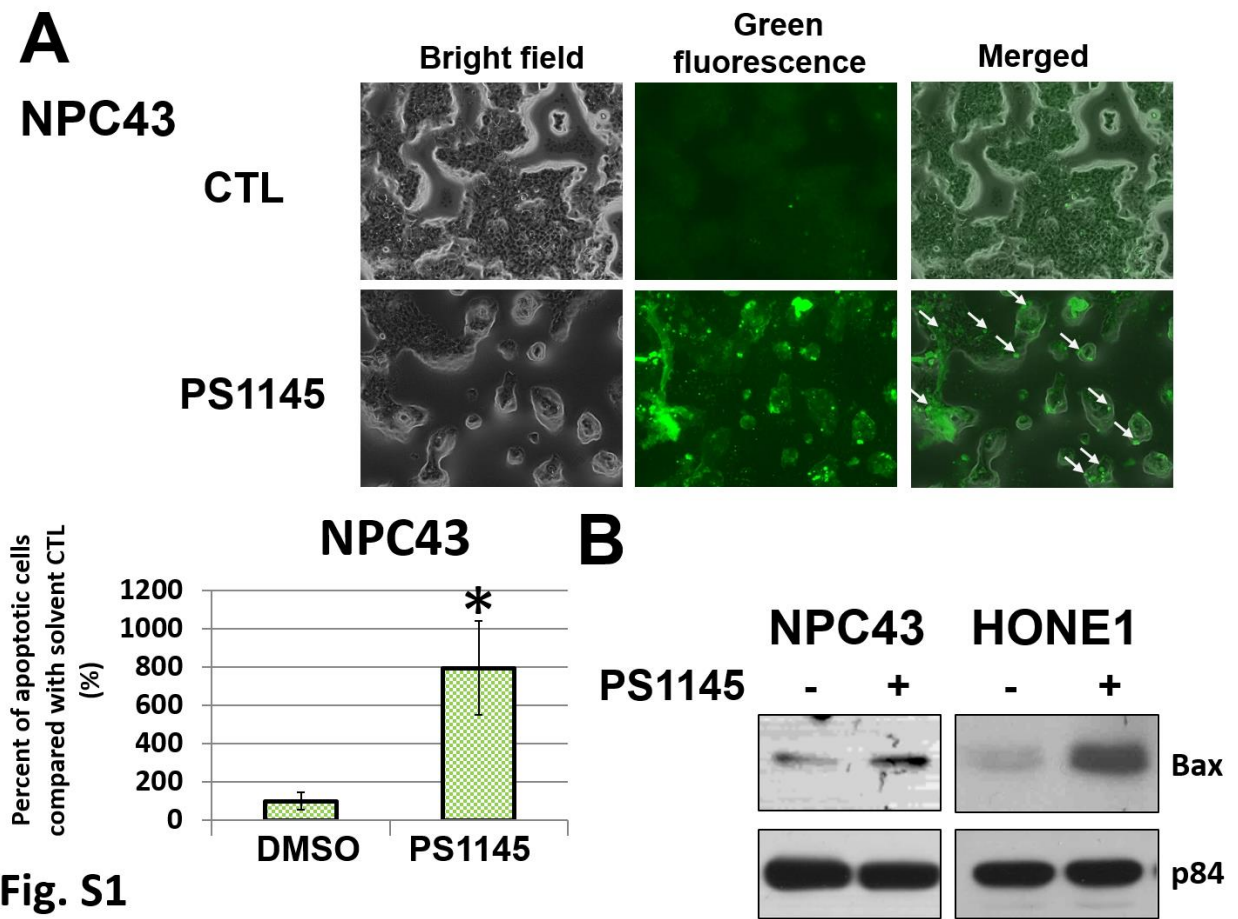

**Fig. S1**

Figure S1. (A) Apoptosis analysis of the effects of PS1145 in NPC43 cells. The TUNEL assay was used to detect the apoptotic cells on day 3 after the treatment with 32  $\mu$ M PS1145. Representative results are shown in the upper panel. The white arrows indicate the apoptotic cells. The bar chart shows the percentage of number of apoptotic cells formed after treatment with PS1145 or the solvent control (DMSO). \*,  $p$  value < 0.05. (B) Western blot analysis of the protein expression of the apoptotic factor Bax after the PS1145 treatment (32  $\mu$ M).

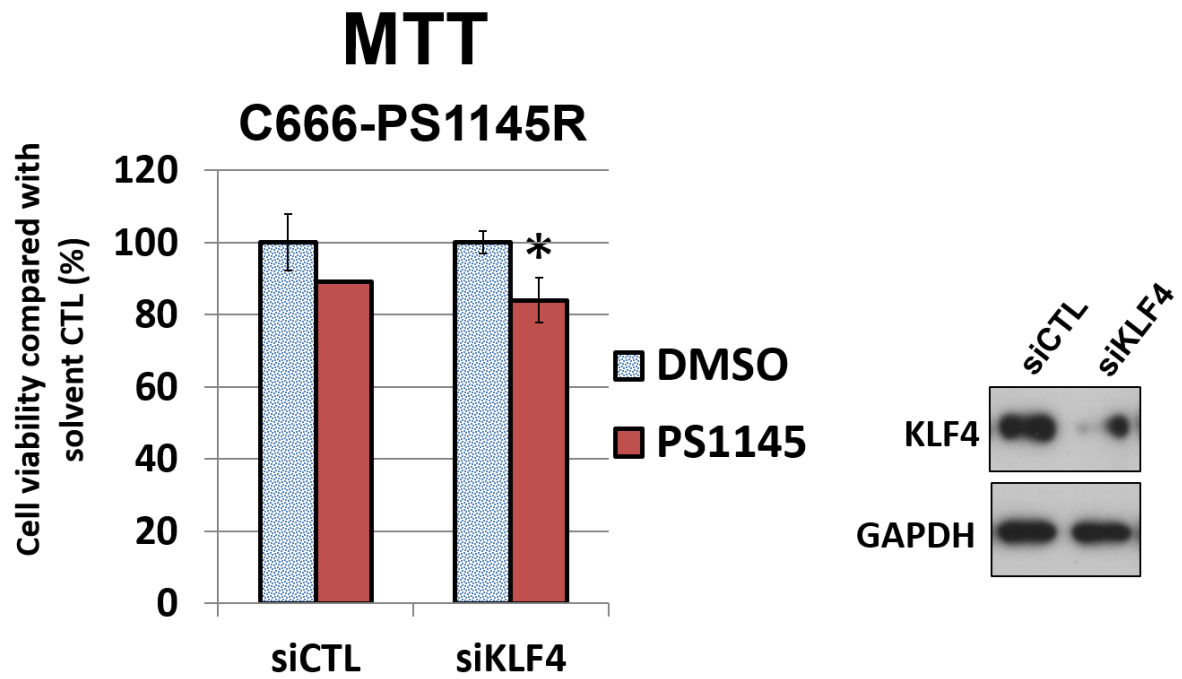

**Fig. S2**

Figure S2. Cell viability in response to PS1145 (32  $\mu$ M) after treatment with *KLF4* siRNA in C666-PS1145R cells. The MTT assay was performed to detect the cell viability. Western blot analysis of the protein expression of KLF4 after siRNA knockdown in these cells. siCTL, scramble control siRNA.

# C666-PS1145R

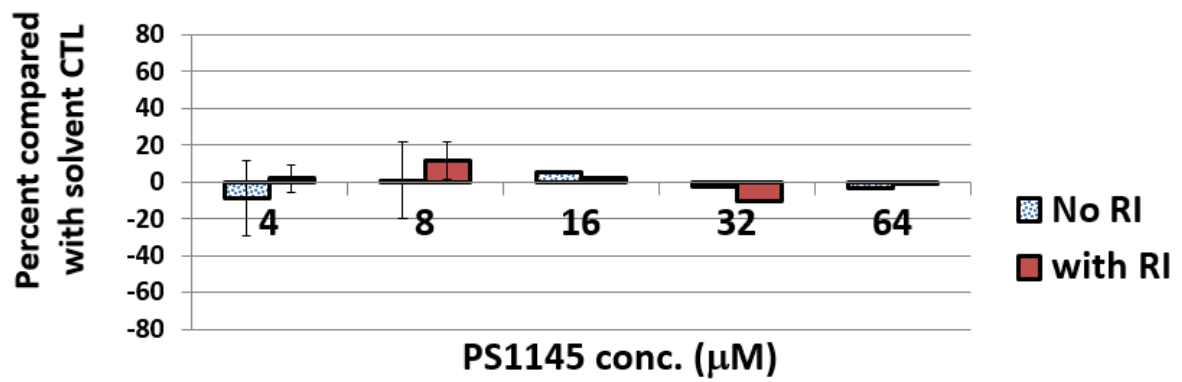

**Fig. S3**

Figure S3. Examination of the effects of the ROCK inhibitor (RI) Y27632 on the cell viability of C666-PS1145R in the presence or absence or various amounts of PS1145. The cell viability was detected by MTT.

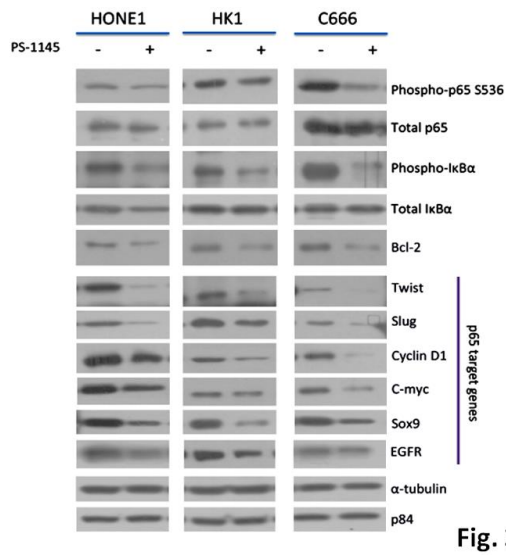

Fig. 3

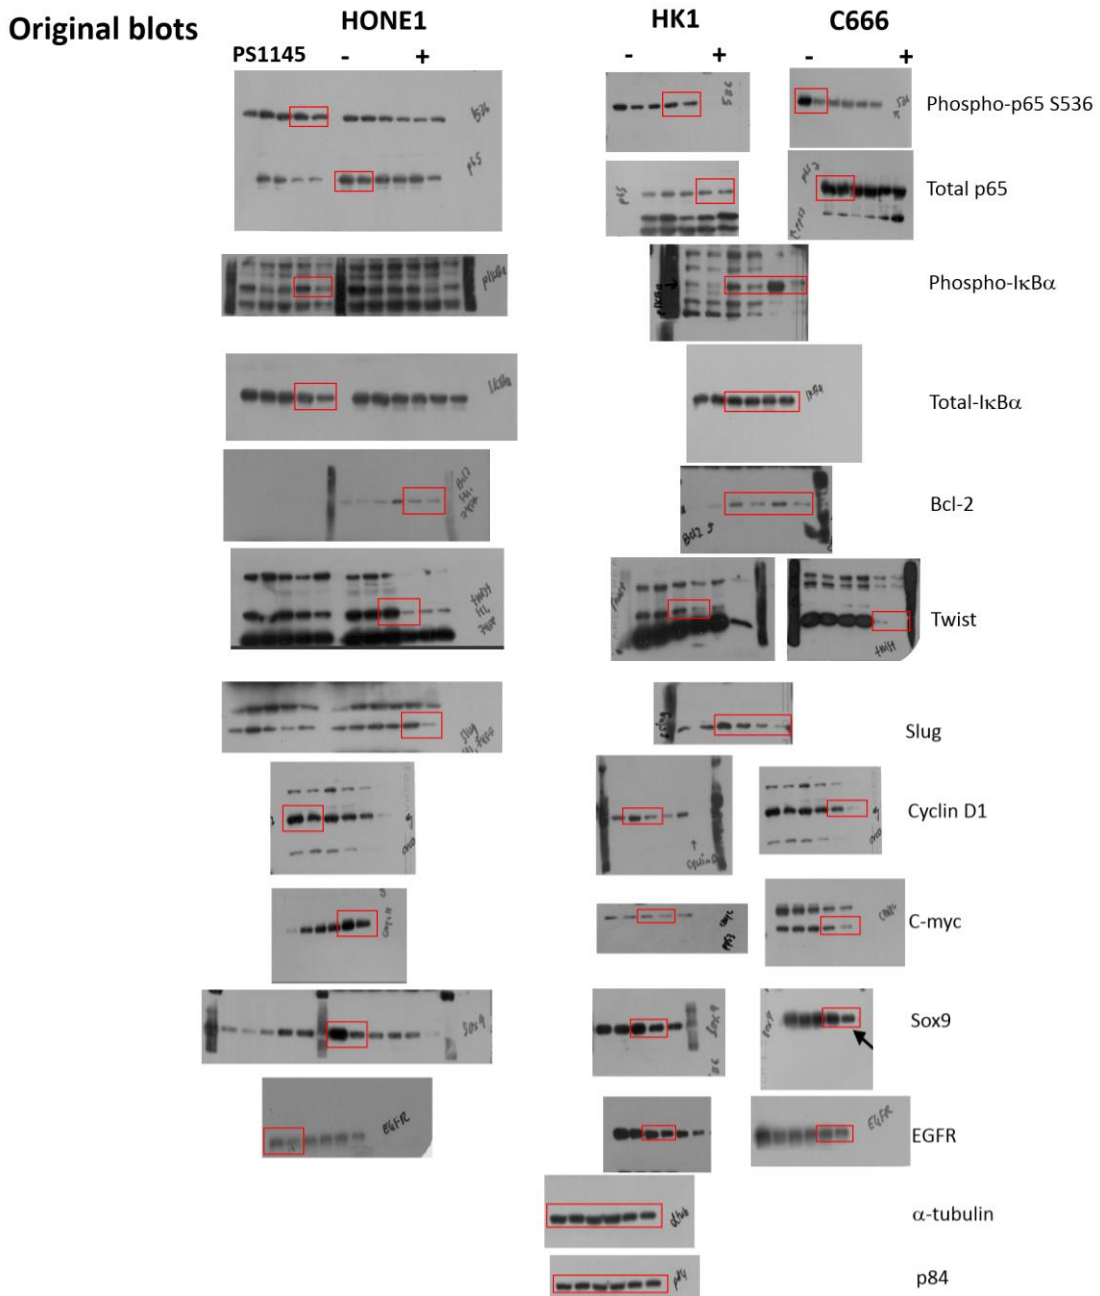

Figure S4. Full immunoblots for Fig. 3. Fig. 3 is shown on the upper panel and the original blots are shown on the lower panel. The red box indicated the cropped area in the original blot.

**Fig. 4C**

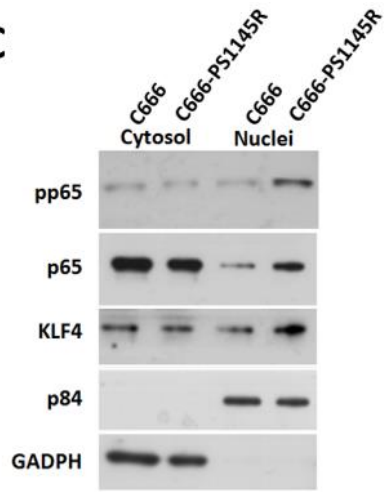

**Original blots**

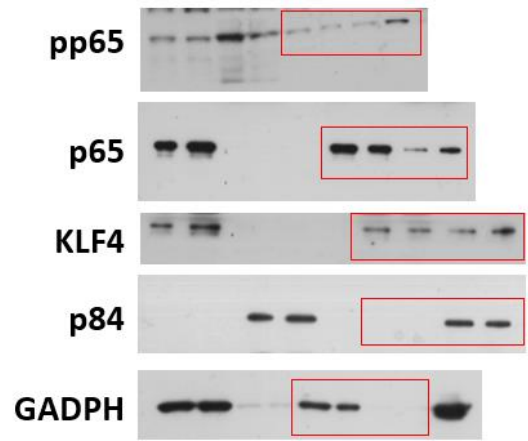

Figure S5. Full immunoblots for Fig. 4C. Fig. 4C is shown on the left and the original blots are shown on the right. The red box indicated the cropped area in the original blot.

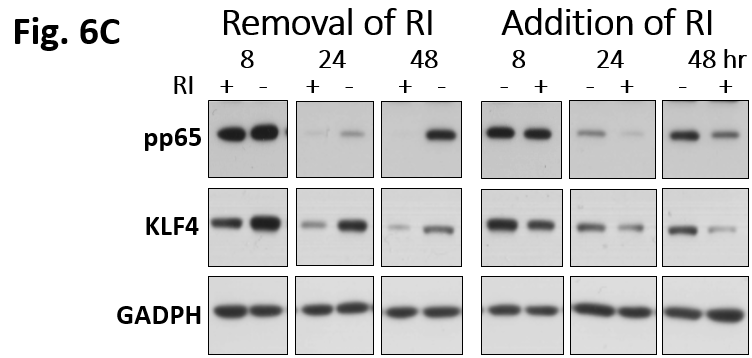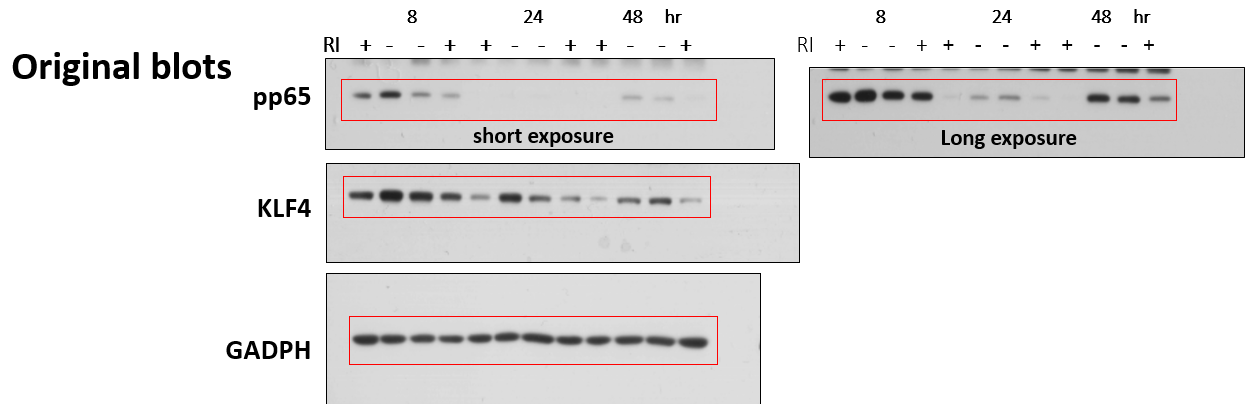

Figure S6. Full immunoblots for Fig. 6C. Fig. 6C is shown on the upper panel and the original blots are shown on the lower panel. Both long and short exposure versions for detection of pp65 are shown. The red box indicated the cropped area in the original blot.

**Fig. 7B**

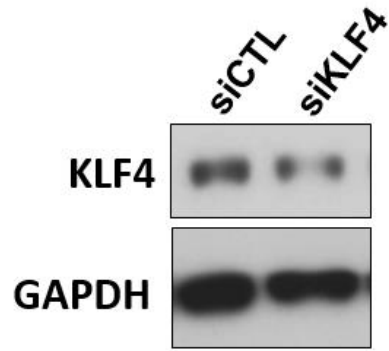

**Original blots**

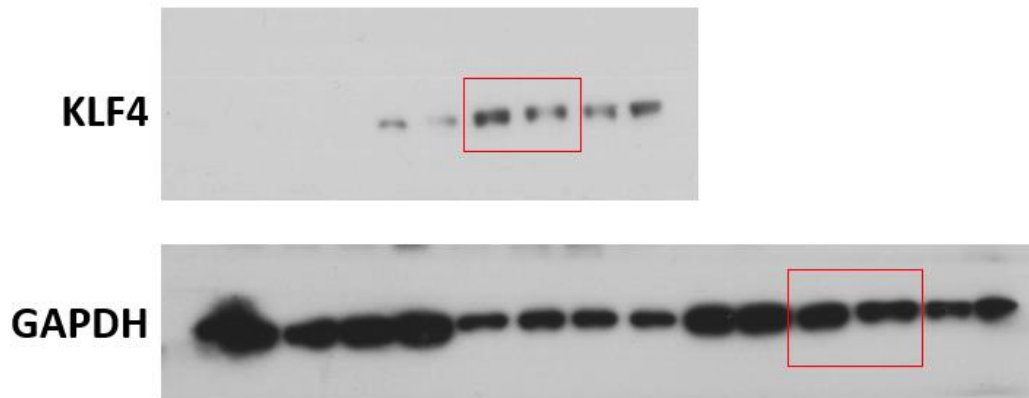

Figure S7. Full immunoblots for Fig. 7B. Fig. 7B is shown on the upper panel and the original blots are shown on the lower panel. The red box indicated the cropped area in the original blot.



**Fig. S1**

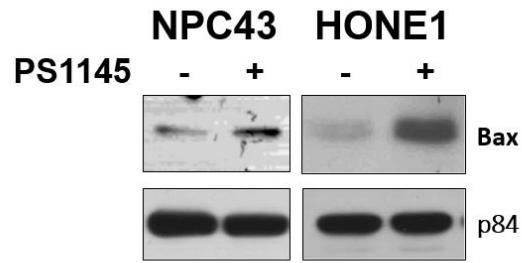

**Original blots**

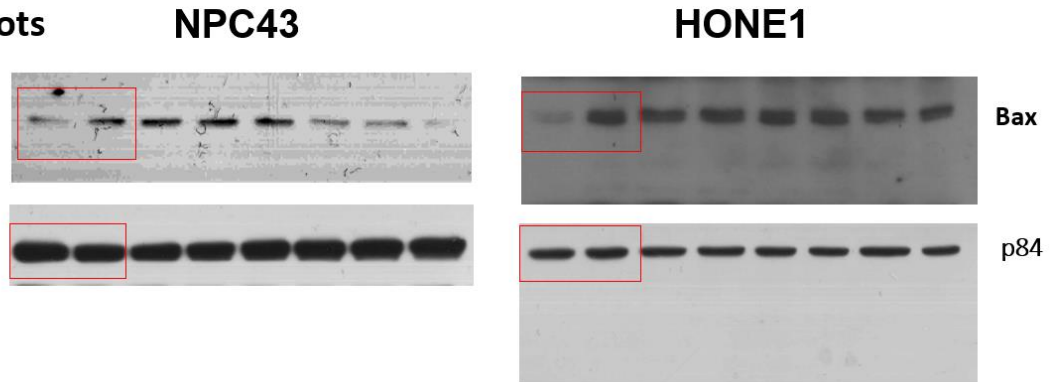

Figure S8. Full immunoblots for Fig. S1. Fig. S1 is shown on the upper panel and the original blots are shown on the lower panel. The red box indicated the cropped area in the original blot.

**Fig. S2**

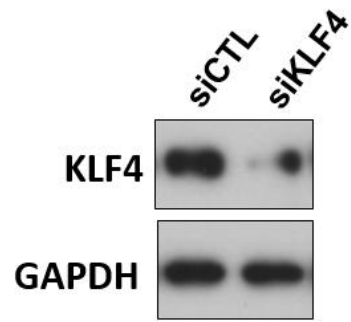

**Original blots**

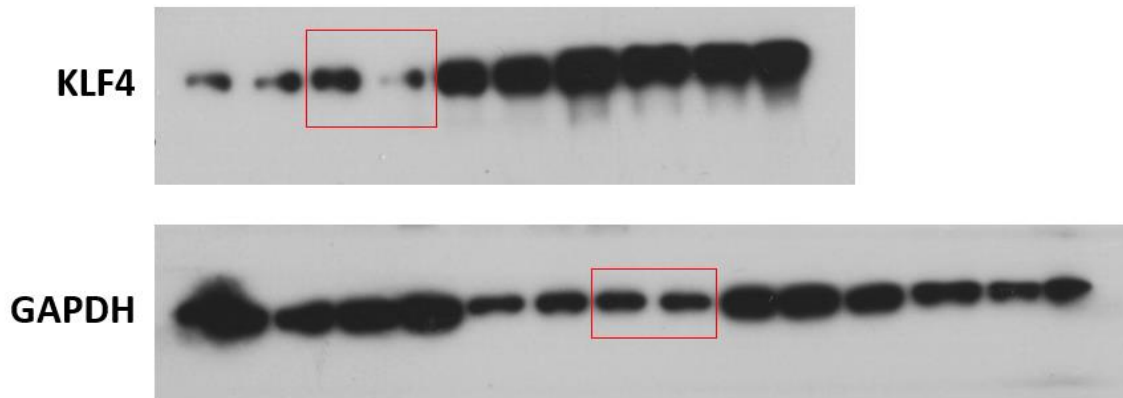

Figure S9. Full immunoblots for Fig. S2. Fig. S2 is shown on the upper panel and the original blots are shown on the lower panel. The red box indicated the cropped area in the original blot.

Table S1. Raw data of full measurements of tumor sizes in the HONE1 solvent control group (measured in mm)

| Animal | Length wk0 | Width | Height | Length wk0.5 | Width | Height | Length wk1 | Width | Height | Length wk1.5 | Width | Height | Length wk2 | Width | Height |
|--------|------------|-------|--------|--------------|-------|--------|------------|-------|--------|--------------|-------|--------|------------|-------|--------|
| 1      | 0          | 0     | 0      | 10.8         | 6.1   | 1.8    | 0          | 0     | 0      | 0            | 0     | 0      | 0          | 0     | 0      |
| 2      | 0          | 0     | 0      | 0            | 0     | 0      | 8.5        | 5.8   | 1.7    | 16.3         | 8.3   | 5.1    | 14         | 13.3  | 6.5    |
| 3      | 0          | 0     | 0      | 10.8         | 7.8   | 0.5    | 14         | 8.6   | 3.5    | 11.7         | 13.9  | 5.5    | 20         | 9.8   | 6.1    |
| 4      | 0          | 0     | 0      | 7.5          | 7.6   | 1.9    | 11.5       | 9.4   | 5      | 8            | 3.7   | 2.5    | 20.4       | 15.5  | 7.5    |
| 5      | 0          | 0     | 0      | 8.8          | 7.5   | 3.6    | 14.6       | 6.3   | 1.9    | 10.5         | 5.2   | 6.4    | 17.2       | 13.7  | 7      |
| 6      | 0          | 0     | 0      | 10.1         | 9.2   | 2.9    | 4.6        | 7.6   | 3      | 14.3         | 10.9  | 2.7    | 13.5       | 10.6  | 5.2    |
| 7      | 0          | 0     | 0      | 0            | 0     | 0      | 16.8       | 8.9   | 2.8    | 14.7         | 7.4   | 4.4    | 21         | 12    | 5.2    |
| 8      | 0          | 0     | 0      | 11.3         | 5.7   | 1.4    | 13.6       | 9.7   | 3.6    | 18.4         | 10    | 7.9    | 18         | 9.8   | 4.6    |
| 9      | 0          | 0     | 0      | 16.1         | 8     | 1.9    | 11         | 9.3   | 2.9    | 8.3          | 6.5   | 5.4    | 20.4       | 12.4  | 6.5    |
| 10     | 0          | 0     | 0      | 9.7          | 6.9   | 0.5    | 11.1       | 9.3   | 2.3    | 18           | 9.1   | 4.6    | 21.8       | 14.3  | 6      |
| 11     | 0          | 0     | 0      | 0            | 0     | 0      | 10.7       | 9     | 5.5    | 20.7         | 10.7  | 4.6    | 22.1       | 12.1  | 4.5    |
| 12     | 12         | 5     | 0.5    | 14.1         | 6.5   | 1.5    | 15.4       | 7.5   | 2.3    | 17.6         | 14.2  | 5.7    | 14.7       | 12    | 5.5    |

Table S2. Average tumor sizes in the HONE1 solvent control group (measured in mm<sup>3</sup>)

|         |    | HONE1 solvent control - tumor size mm <sup>3</sup> |          |          |          |          |          |
|---------|----|----------------------------------------------------|----------|----------|----------|----------|----------|
|         |    | week                                               | 0        | 0.5      | 1        | 1.5      | 2        |
| animal  | 1  |                                                    | 0        | 118.584  | 0        | 0        | 0        |
|         | 2  |                                                    | 0        | 0        | 83.81    | 689.979  | 1210.3   |
|         | 3  |                                                    | 0        | 42.12    | 421.4    | 894.465  | 1195.6   |
|         | 4  |                                                    | 0        | 108.3    | 540.5    | 74       | 2371.5   |
|         | 5  |                                                    | 0        | 237.6    | 174.762  | 349.44   | 1649.48  |
|         | 6  |                                                    | 0        | 269.468  | 104.88   | 420.849  | 744.12   |
|         | 7  |                                                    | 0        | 0        | 418.656  | 478.632  | 1310.4   |
|         | 8  |                                                    | 0        | 90.174   | 474.912  | 1453.6   | 811.44   |
|         | 9  |                                                    | 0        | 244.72   | 296.67   | 291.33   | 1644.24  |
|         | 10 |                                                    | 0        | 33.465   | 237.429  | 753.48   | 1870.44  |
|         | 11 |                                                    | 0        | 0        | 529.65   | 1018.854 | 1203.345 |
|         | 12 |                                                    | 30       | 137.475  | 265.65   | 1424.544 | 970.2    |
| average |    |                                                    | 2.727273 | 105.7565 | 322.5745 | 713.5612 | 1361.915 |
| SD      |    |                                                    | 4.52267  | 51.86023 | 82.15622 | 225.9429 | 242.7365 |

Table S3. Raw data of body weights in the HONE1 solvent control group (measured in g)

|         |    | HONE1 solvent control |             |          |          |          |         |
|---------|----|-----------------------|-------------|----------|----------|----------|---------|
|         |    | wk                    | 0           | 0.5      | 1        | 1.5      | 2       |
| animal  | 1  |                       | 14.9        | 16.3     | 14       | 15       | 16      |
|         | 2  |                       | 16.6        | 15.7     | 15.7     | 17.8     | 19.6    |
|         | 3  |                       | 13.9        | 14.6     | 13.9     | 17.9     | 18.2    |
|         | 4  |                       | 14.8        | 15.4     | 15.2     | 16.5     | 18.2    |
|         | 5  |                       | 16.3        | 14.9     | 17.3     | 17.2     | 17.5    |
|         | 6  |                       | 15.2        | 16.5     | 15       | 16       | 17.8    |
|         | 7  |                       | 15.6        | 13.8     | 14.9     | 18.6     | 16.7    |
|         | 8  |                       | 14.2        | 17.1     | 16.2     | 15.5     | 18.7    |
|         | 9  |                       | 13.7        | 15.5     | 15.2     | 16.6     | 17.2    |
|         | 10 |                       | 15.6        | 13.7     | 16.1     | 16       | 18.3    |
|         | 11 |                       | 16.4        | 15.6     | 16.8     | 15.8     | 16.2    |
|         | 12 |                       | 15.3        | 14.3     | 17.2     | 17.4     | 17.4    |
| average |    |                       | 15.20833333 | 15.28333 | 15.625   | 16.69167 | 17.65   |
| SD      |    |                       | 0.479800306 | 0.53165  | 0.566539 | 0.547082 | 0.52158 |

Table S4. Raw data of full measurement of tumor sizes in the HONE1 PS1145 treatment group (measured in mm)

| Animal | Length wk0 | With | Height | Length wk0.5 | With | Height | Length wk1 | With | Height | Length wk1.5 | With | Height | Length wk2 | With | Height |
|--------|------------|------|--------|--------------|------|--------|------------|------|--------|--------------|------|--------|------------|------|--------|
| 1      | 0          | 0    | 0      | 10.5         | 5.4  | 1.8    | 14.2       | 10.3 | 0.5    | 14.5         | 11.5 | 4      | 16.8       | 12.8 | 4.3    |
| 2      | 8          | 5    | 0.5    | 10.9         | 6.5  | 3      | 12         | 8.8  | 0.5    | 11.2         | 11.4 | 3.1    | 14         | 9.8  | 4.8    |
| 3      | 0          | 0    | 0      | 14.2         | 7.8  | 0.5    | 11.2       | 6.5  | 0.5    | 13.7         | 12.9 | 3      | 14.8       | 12.1 | 2.1    |
| 4      | 0          | 0    | 0      | 0            | 0    | 0      | 16.8       | 7.8  | 2.7    | 9.7          | 7.8  | 3      | 17.3       | 12   | 5.3    |
| 5      | 0          | 0    | 0      | 11.4         | 6.9  | 1.8    | 16.4       | 7.9  | 4      | 19.2         | 8.2  | 3      | 14.7       | 13.4 | 4.5    |
| 6      | 0          | 0    | 0      | 3.6          | 4.1  | 0.5    | 16.6       | 10.3 | 3      | 14.2         | 9    | 2.7    | 14.9       | 10.7 | 6.7    |
| 7      | 0          | 0    | 0      | 0            | 0    | 0      | 10.4       | 9.8  | 0.5    | 1.8          | 8.7  | 3.3    | 16.6       | 12.2 | 6.3    |
| 8      | 0          | 0    | 0      | 11.2         | 7.3  | 1.9    | 11.7       | 7.9  | 3.3    | 14.3         | 9.3  | 2.4    | 18.6       | 15.4 | 2.6    |
| 9      | 0          | 0    | 0      | 13           | 7    | 0.5    | 15.6       | 8.6  | 2.5    | 14           | 14.7 | 1.8    | 17.8       | 16   | 2.1    |
| 10     | 0          | 0    | 0      | 0            | 0    | 0      | 10.1       | 8.6  | 0.5    | 14.7         | 12   | 3      | 13.9       | 11.8 | 2.5    |
| 11     | 0          | 0    | 0      | 0            | 0    | 0      | 12.2       | 7.5  | 0.5    | 12.3         | 7.9  | 5.1    | 19.7       | 8.7  | 2.6    |
| 12     | 0          | 0    | 0      | 0            | 0    | 0      | 10.6       | 6.9  | 2.5    | 17.4         | 10   | 3.1    | 18.2       | 13.4 | 4.8    |

Table S5. Average tumor sizes in the HONE1 PS1145 treatment group (measured in mm<sup>3</sup>)

|         |    | HONE1 + PS1145 - tumor size mm <sup>3</sup> |          |          |          |          |          |
|---------|----|---------------------------------------------|----------|----------|----------|----------|----------|
|         |    | week                                        | 0        | 0.5      | 1        | 1.5      | 2        |
| animal  | 1  | 0                                           | 102.06   | 73.13    | 667      | 924.672  |          |
|         | 2  | 20                                          | 212.55   | 52.8     | 395.808  | 658.56   |          |
|         | 3  | 0                                           | 55.38    | 36.4     | 530.19   | 376.068  |          |
|         | 4  | 0                                           | 0        | 353.808  | 226.98   | 1100.28  |          |
|         | 5  | 0                                           | 141.588  | 518.24   | 472.32   | 886.41   |          |
|         | 6  | 0                                           | 7.38     | 512.94   | 345.06   | 1068.181 |          |
|         | 7  | 0                                           | 0        | 50.96    | 51.678   | 1275.876 |          |
|         | 8  | 0                                           | 155.344  | 305.019  | 319.176  | 744.744  |          |
|         | 9  | 0                                           | 45.5     | 335.4    | 370.44   | 598.08   |          |
|         | 10 | 0                                           | 0        | 43.43    | 529.2    | 410.05   |          |
|         | 11 | 0                                           | 0        | 45.75    | 495.567  | 445.614  |          |
|         | 12 | 0                                           | 0        | 182.85   | 539.4    | 1170.624 |          |
| average |    |                                             | 1.666667 | 59.9835  | 209.2273 | 411.9016 | 804.9299 |
| SD      |    |                                             | 2.886751 | 37.47365 | 93.72937 | 82.39778 | 155.9302 |

Table S6. Raw data of body weights in the HONE1 PS1145 treatment group (measured in g)

|         |    | HONE1 + PS1145 |          |          |          |          |   |
|---------|----|----------------|----------|----------|----------|----------|---|
|         |    | wk             | 0        | 0.5      | 1        | 1.5      | 2 |
| animal  | 1  | 16.2           | 16.5     | 15.6     | 17.7     | 18.6     |   |
|         | 2  | 15.7           | 16.4     | 16.4     | 18.1     | 19.2     |   |
|         | 3  | 15.9           | 16.5     | 16.8     | 17.6     | 18.1     |   |
|         | 4  | 17.4           | 15.9     | 16.9     | 17       | 18.7     |   |
|         | 5  | 16.3           | 16       | 18       | 18.2     | 17.4     |   |
|         | 6  | 15.3           | 15.7     | 17.2     | 17.3     | 17.6     |   |
|         | 7  | 16.6           | 15       | 16.9     | 17.7     | 18.4     |   |
|         | 8  | 16.3           | 18.1     | 16       | 16.5     | 17.4     |   |
|         | 9  | 15.1           | 16.3     | 17.3     | 17.5     | 16.9     |   |
|         | 10 | 17.7           | 15       | 18.6     | 16.8     | 19.2     |   |
|         | 11 | 14.8           | 18.2     | 15.4     | 17.1     | 18.8     |   |
|         | 12 | 16.1           | 16.4     | 16.6     | 18.5     | 17.4     |   |
| average |    | 16.11666667    | 16.33333 | 16.80833 | 17.5     | 18.14167 |   |
| SD      |    | 0.429499356    | 0.498331 | 0.460957 | 0.296954 | 0.391651 |   |

Table S7. Raw data of full measurements of tumor sizes in the C666 solvent control group (measured in mm)

| Animal | Length wk0 | Width | Height | Length wk0.5 | Width | Height | Length wk1 | Width | Height | Length wk1.5 | Width | Height | Length wk2 | Width | Height |
|--------|------------|-------|--------|--------------|-------|--------|------------|-------|--------|--------------|-------|--------|------------|-------|--------|
| 1      | 8          | 6     | 0.5    | 8            | 4     | 0.5    | 11.4       | 5.5   | 1.1    | 11.6         | 6.1   | 3.1    | 13.8       | 8.2   | 4.2    |
| 2      | 16         | 4     | 0.5    | 5            | 3     | 0.5    | 9.6        | 5.6   | 2.6    | 9.5          | 8.4   | 2.6    | 12.7       | 10.3  | 4.7    |
| 3      | 0          | 0     | 0      | 15           | 3     | 0.5    | 11.9       | 6     | 2.3    | 9.9          | 8.1   | 4.1    | 14.7       | 9.4   | 4.1    |
| 4      | 0          | 0     | 0      | 4            | 4     | 5      | 11.9       | 6.6   | 1.8    | 13           | 7.9   | 2.5    | 14.7       | 8     | 4.4    |
| 5      | 9          | 6     | 0.5    | 0            | 0     | 0      | 8.2        | 5.2   | 1.1    | 9            | 7     | 2.7    | 14.5       | 8.4   | 3.4    |
| 6      | 0          | 0     | 0      | 14           | 3     | 0.5    | 10.1       | 5.3   | 1.5    | 13           | 7.3   | 2.3    | 15.3       | 7.7   | 2      |
| 7      | 7          | 6     | 1      | 9            | 4     | 0.5    | 12.5       | 4.6   | 0.5    | 13.4         | 6.9   | 1.8    | 6.6        | 8.6   | 2.3    |
| 8      | 0          | 0     | 0      | 14           | 3     | 0.5    | 7.4        | 4.6   | 0.5    | 9            | 6.3   | 2.1    | 13.4       | 9.1   | 4.1    |
| 9      | 0          | 0     | 0      | 8            | 5     | 0.5    | 12.2       | 4.7   | 2.2    | 12.4         | 6     | 2.4    | 13         | 9.5   | 5      |
| 10     | 8          | 4     | 5      | 13           | 4     | 0.5    | 5.5        | 5     | 0.5    | 12.7         | 5.7   | 0.5    | 11.1       | 8.7   | 4.3    |
| 11     | 7          | 5     | 0.5    | 0            | 0     | 0      | 13.2       | 5.5   | 1.7    | 10.6         | 7.7   | 4      | 11.1       | 7     | 3.5    |

Table S8. Average tumor sizes in the C666 solvent control group (measured in mm<sup>3</sup>)

| C666 solvent control - tumor size mm <sup>3</sup> |    |          |          |          |          |          |
|---------------------------------------------------|----|----------|----------|----------|----------|----------|
| week                                              |    | 0        | 0.5      | 1        | 1.5      | 2        |
| animal                                            | 1  | 24       | 16       | 68.97    | 219.356  | 475.272  |
|                                                   | 2  | 32       | 7.5      | 139.776  | 207.48   | 614.807  |
|                                                   | 3  | 0        | 22.5     | 164.22   | 328.779  | 566.538  |
|                                                   | 4  | 0        | 80       | 141.372  | 256.75   | 517.44   |
|                                                   | 5  | 27       | 0        | 46.904   | 170.1    | 414.12   |
|                                                   | 6  | 0        | 21       | 80.295   | 218.27   | 235.62   |
|                                                   | 7  | 42       | 18       | 28.75    | 166.428  | 130.548  |
|                                                   | 8  | 0        | 21       | 17.02    | 119.07   | 499.954  |
|                                                   | 9  | 0        | 20       | 126.148  | 178.56   | 617.5    |
|                                                   | 10 | 160      | 26       | 13.75    | 36.195   | 415.251  |
|                                                   | 11 | 17.5     | 0        | 123.42   | 326.48   | 271.95   |
| average                                           |    | 27.85    | 21.6     | 88.1655  | 200.8112 | 428.3728 |
| SD                                                |    | 24.53287 | 11.27793 | 28.79931 | 44.73609 | 83.89311 |

Table S9. Raw data of body weights in the C666 solvent control group (measured in g)

| C666 solvent control |    |             |          |          |          |          |
|----------------------|----|-------------|----------|----------|----------|----------|
| wk                   |    | 0           | 0.5      | 1        | 1.5      | 2        |
| animal               | 1  | 18.2        | 18.9     | 19.1     | 18.9     | 19.6     |
|                      | 2  | 20          | 18.4     | 19.8     | 18.9     | 18.5     |
|                      | 3  | 16.5        | 17.8     | 18.5     | 19.8     | 18.9     |
|                      | 4  | 19.4        | 16.7     | 18.2     | 17.9     | 19.5     |
|                      | 5  | 18.3        | 18.6     | 17.3     | 17.7     | 19.1     |
|                      | 6  | 20.8        | 16.8     | 18.6     | 18       | 18.1     |
|                      | 7  | 18.8        | 20.5     | 17       | 18.1     | 19.3     |
|                      | 8  | 19.2        | 18.5     | 18.8     | 18.6     | 19       |
|                      | 9  | 17.1        | 18.4     | 19.1     | 18.9     | 19.6     |
|                      | 10 | 19.2        | 19.2     | 18.2     | 17       | 19.7     |
|                      | 11 | 19.8        | 17.9     | 18.8     | 18.4     | 18.2     |
| average              |    | 18.84545455 | 18.33636 | 18.49091 | 18.38182 | 19.04545 |
| SD                   |    | 0.630223626 | 0.533044 | 0.402153 | 0.377371 | 0.284924 |

Table S10. Raw data of full measurements of tumor sizes in the C666 PS1145 treatment group (measured in mm)

| Animal | Length<br>wk0 | With | Height | Length<br>wk0.5 | With | Height | Length<br>wk1 | With | Height | Length<br>wk1.5 | With | Height | Length<br>wk2 | With | Height |
|--------|---------------|------|--------|-----------------|------|--------|---------------|------|--------|-----------------|------|--------|---------------|------|--------|
| 1      | 0             | 0    | 0      | 4               | 4    | 0.5    | 7.9           | 6    | 1.5    | 11.3            | 6.1  | 1.4    | 11.8          | 5.6  | 1.3    |
| 2      | 0             | 0    | 0      | 5               | 4    | 0.5    | 5.6           | 5.6  | 0.9    | 10.8            | 7    | 0.5    | 13            | 6.8  | 1.5    |
| 3      | 0             | 0    | 0      | 12              | 3    | 0.5    | 5             | 4.4  | 1.1    | 11.3            | 7.1  | 1.6    | 15.4          | 9.2  | 1.6    |
| 4      | 5             | 5    | 0.5    | 3               | 3    | 0.5    | 11.4          | 5.5  | 1.3    | 9.2             | 4    | 0.5    | 7.1           | 7.8  | 2.2    |
| 5      | 0             | 0    | 0      | 0               | 0    | 0      | 10.3          | 5.9  | 1.2    | 0               | 0    | 0      | 12.1          | 7.4  | 4      |
| 6      | 7             | 5    | 0.5    | 10              | 4    | 0.5    | 5             | 4.5  | 0.5    | 8.4             | 0.2  | 1.5    | 8.9           | 8.3  | 2.4    |
| 7      | 8             | 4    | 0.5    | 5               | 4    | 0.5    | 8.8           | 6.1  | 0.5    | 10.5            | 6.7  | 3.2    | 10.5          | 6.6  | 2.4    |
| 8      | 10            | 6    | 1      | 0               | 0    | 0      | 10.8          | 6.3  | 0.5    | 4.7             | 3.4  | 0.5    | 9.5           | 7    | 2      |
| 9      | 7             | 7    | 0.5    | 13              | 3    | 0.5    | 7.7           | 6.4  | 1.4    | 6               | 6    | 1.7    | 7.2           | 5.9  | 2      |
| 10     | 11            | 5    | 0.5    | 6               | 4    | 0.5    | 11            | 5    | 1.3    | 9.5             | 6.5  | 2.2    | 8.2           | 8.8  | 1.8    |
| 11     | 0             | 0    | 0      | 0               | 0    | 0      | 9.8           | 4.4  | 0.5    | 6.3             | 4.5  | 0.5    | 9.6           | 5.1  | 0.5    |
| 12     | 0             | 0    | 0      | 6               | 5    | 0.5    | 7.7           | 5.8  | 1.4    | 10.2            | 6.3  | 2.1    | 12.1          | 8.4  | 3      |

Table S11. Average tumor sizes in the C666 PS1145 treatment group (measured in mm<sup>3</sup>)

|         |    | C666 + PS1145 - tumor size mm <sup>3</sup> |          |          |          |          |          |
|---------|----|--------------------------------------------|----------|----------|----------|----------|----------|
|         |    | week                                       | 0        | 0.5      | 1        | 1.5      | 2        |
| animal  | 1  |                                            | 0        | 8        | 71.1     | 96.502   | 85.904   |
|         | 2  |                                            | 0        | 10       | 28.224   | 37.8     | 132.6    |
|         | 3  |                                            | 0        | 18       | 24.2     | 128.368  | 226.688  |
|         | 4  |                                            | 12.5     | 4.5      | 81.51    | 18.4     | 121.836  |
|         | 5  |                                            | 0        | 0        | 72.924   | 0        | 358.16   |
|         | 6  |                                            | 17.5     | 20       | 11.25    | 2.52     | 177.288  |
|         | 7  |                                            | 16       | 10       | 26.84    | 225.12   | 166.32   |
|         | 8  |                                            | 60       | 0        | 34.02    | 7.99     | 133      |
|         | 9  |                                            | 24.5     | 19.5     | 68.992   | 61.2     | 84.96    |
|         | 10 |                                            | 27.5     | 12       | 71.5     | 135.85   | 129.888  |
|         | 11 |                                            | 0        | 0        | 21.56    | 14.175   | 24.48    |
|         | 12 |                                            | 0        | 15       | 62.524   | 134.946  | 304.92   |
| average |    |                                            | 13.16667 | 9.75     | 47.887   | 71.90592 | 162.1703 |
| SD      |    |                                            | 9.038638 | 3.743934 | 12.73131 | 35.95264 | 47.27306 |

Table S12. Raw data of body weights in the C666 PS1145 treatment group (measured in g)

|         |    | C666 + PS1145 |            |          |      |          |          |
|---------|----|---------------|------------|----------|------|----------|----------|
|         |    | wk            | 0          | 0.5      | 1    | 1.5      | 2        |
| animal  | 1  |               | 18.3       | 18.8     | 17.6 | 18.5     | 17.6     |
|         | 2  |               | 19.1       | 18       | 19   | 18.4     | 19.6     |
|         | 3  |               | 18.7       | 19.7     | 17.7 | 17.6     | 18.9     |
|         | 4  |               | 18.6       | 17.2     | 18.2 | 16.8     | 18.7     |
|         | 5  |               | 16         | 18.3     | 18.8 | 18.1     | 19.1     |
|         | 6  |               | 18.4       | 18.5     | 17.8 | 17.9     | 17.9     |
|         | 7  |               | 17.4       | 18.4     | 18.8 | 18.4     | 19.3     |
|         | 8  |               | 18.1       | 18.3     | 18.1 | 17.3     | 19       |
|         | 9  |               | 17.8       | 17.5     | 18.2 | 18.1     | 18.8     |
|         | 10 |               | 18         | 19.5     | 19.5 | 18       | 18.1     |
|         | 11 |               | 18.4       | 16.5     | 17.7 | 18       | 18.1     |
|         | 12 |               | 19.2       | 17.4     | 18.2 | 17.8     | 18.4     |
| average |    |               | 18.1666667 | 18.175   | 18.3 | 17.90833 | 18.625   |
| SD      |    |               | 0.42604595 | 0.464721 | 0.3  | 0.244446 | 0.303858 |
